# Supplementary material for: Transcriptome analysis of heat stress response in switchgrass (Panicum virgatum L.)
Source: PubMed Central journal article supplement (PMC3851271; doi:10.1186/1471-2229-13-153), 2013-10-06

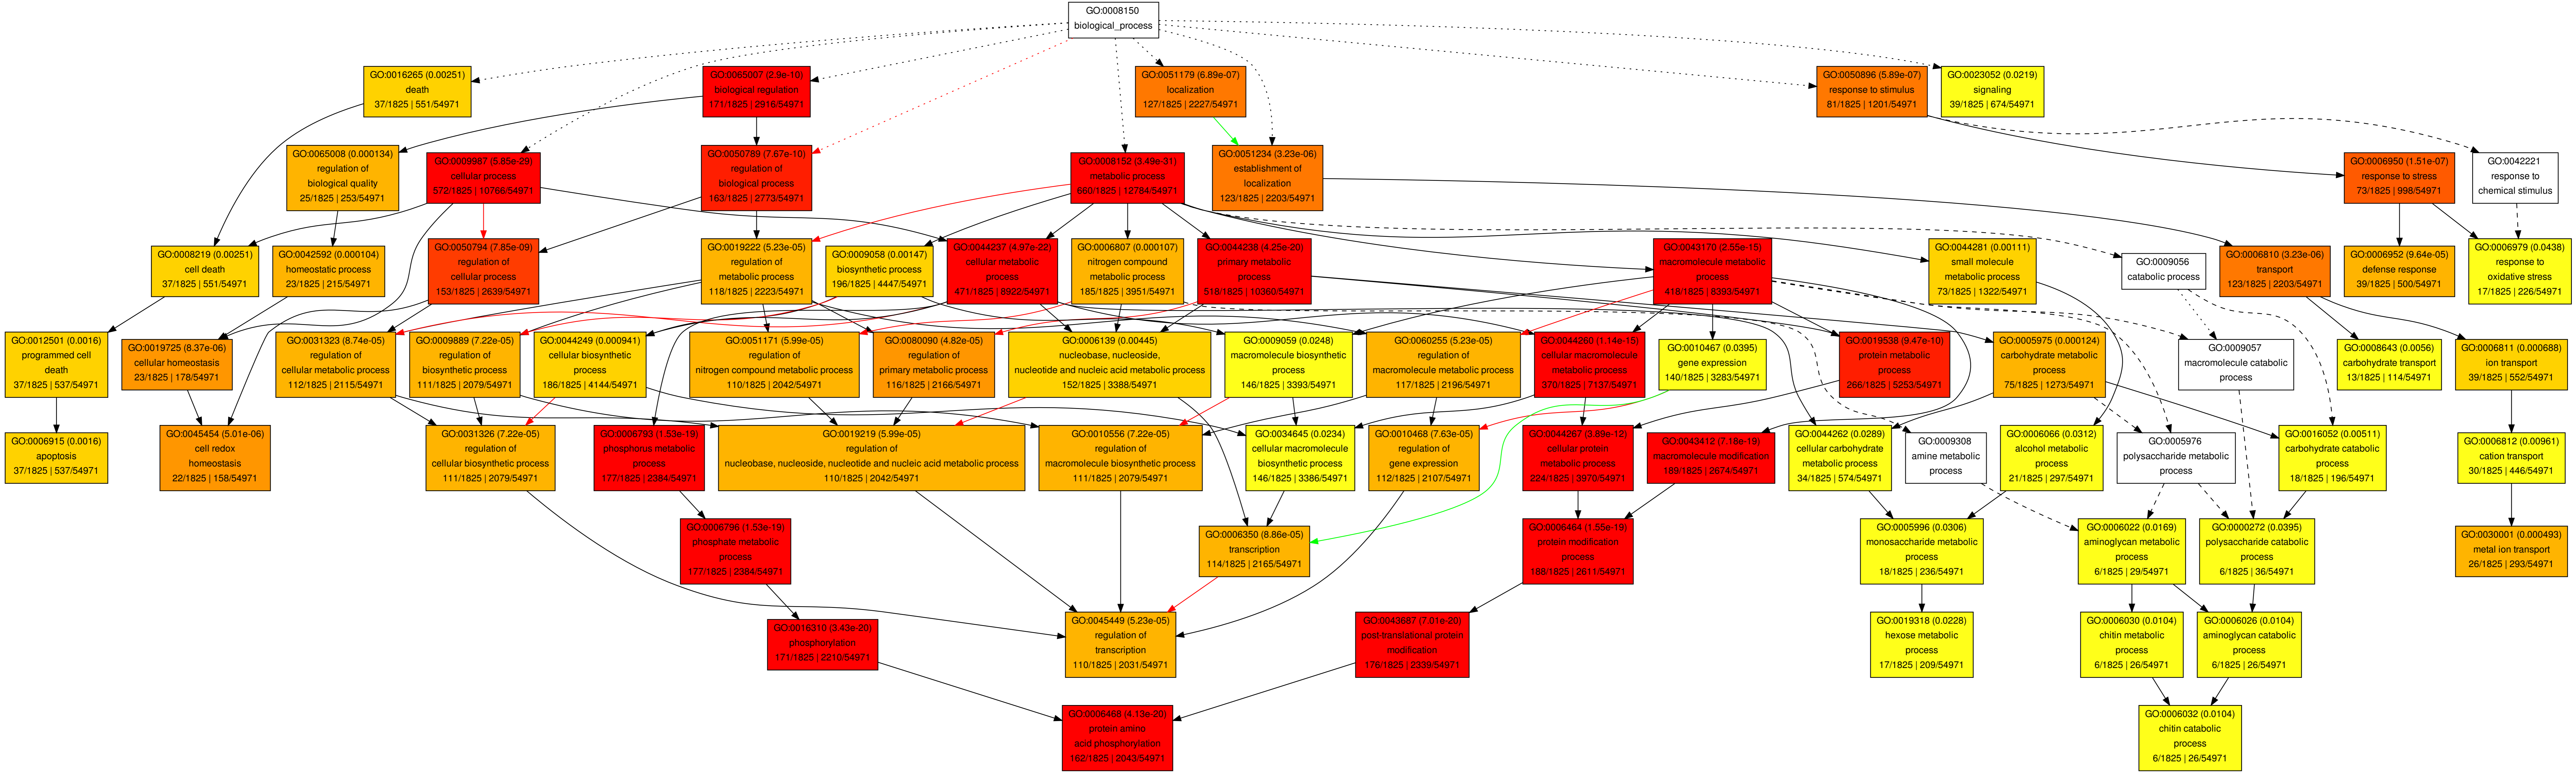

Supplement: 1471-2229-13-153-S4.pdf [file 1471-2229-13-153-S4.pdf]
